# Supplementary material for: Evaluation of multilayer coated magnetic nanoparticles as biocompatible curcumin delivery platforms for breast cancer treatment
Source: Royal Society of Chemistry journal article supplement (doi:10.1039/c5ra13838h), 2015-01-01

## Supporting Information

### Evaluation of Multilayer Coated Magnetic Nanoparticles as Biocompatible Curcumin delivery Platforms for Breast Cancer Treatment

*Table S1. Zeta potentials, particle size distributions and average sizes of different MNPs.*

| Name                                    | Zeta potential(mV) | Average size (nm) |
|-----------------------------------------|--------------------|-------------------|
| <b>Fe<sub>3</sub>O<sub>4</sub> MNPs</b> | + 3.2              | 82±3.1            |
| <b>Fe@PEI</b>                           | +19.1              | 105±3.4           |
| <b>Fe@HAP-PEI</b>                       | +4.9               | 153±6.5           |
| <b>Fe@PEI-CD</b>                        | -4.3               | 205±7.8           |
| <b>Fe@HAP-PEI-CD</b>                    | -11.6              | 260±8.9           |

*Fig. S1: FTIR analysis of different MNPs*

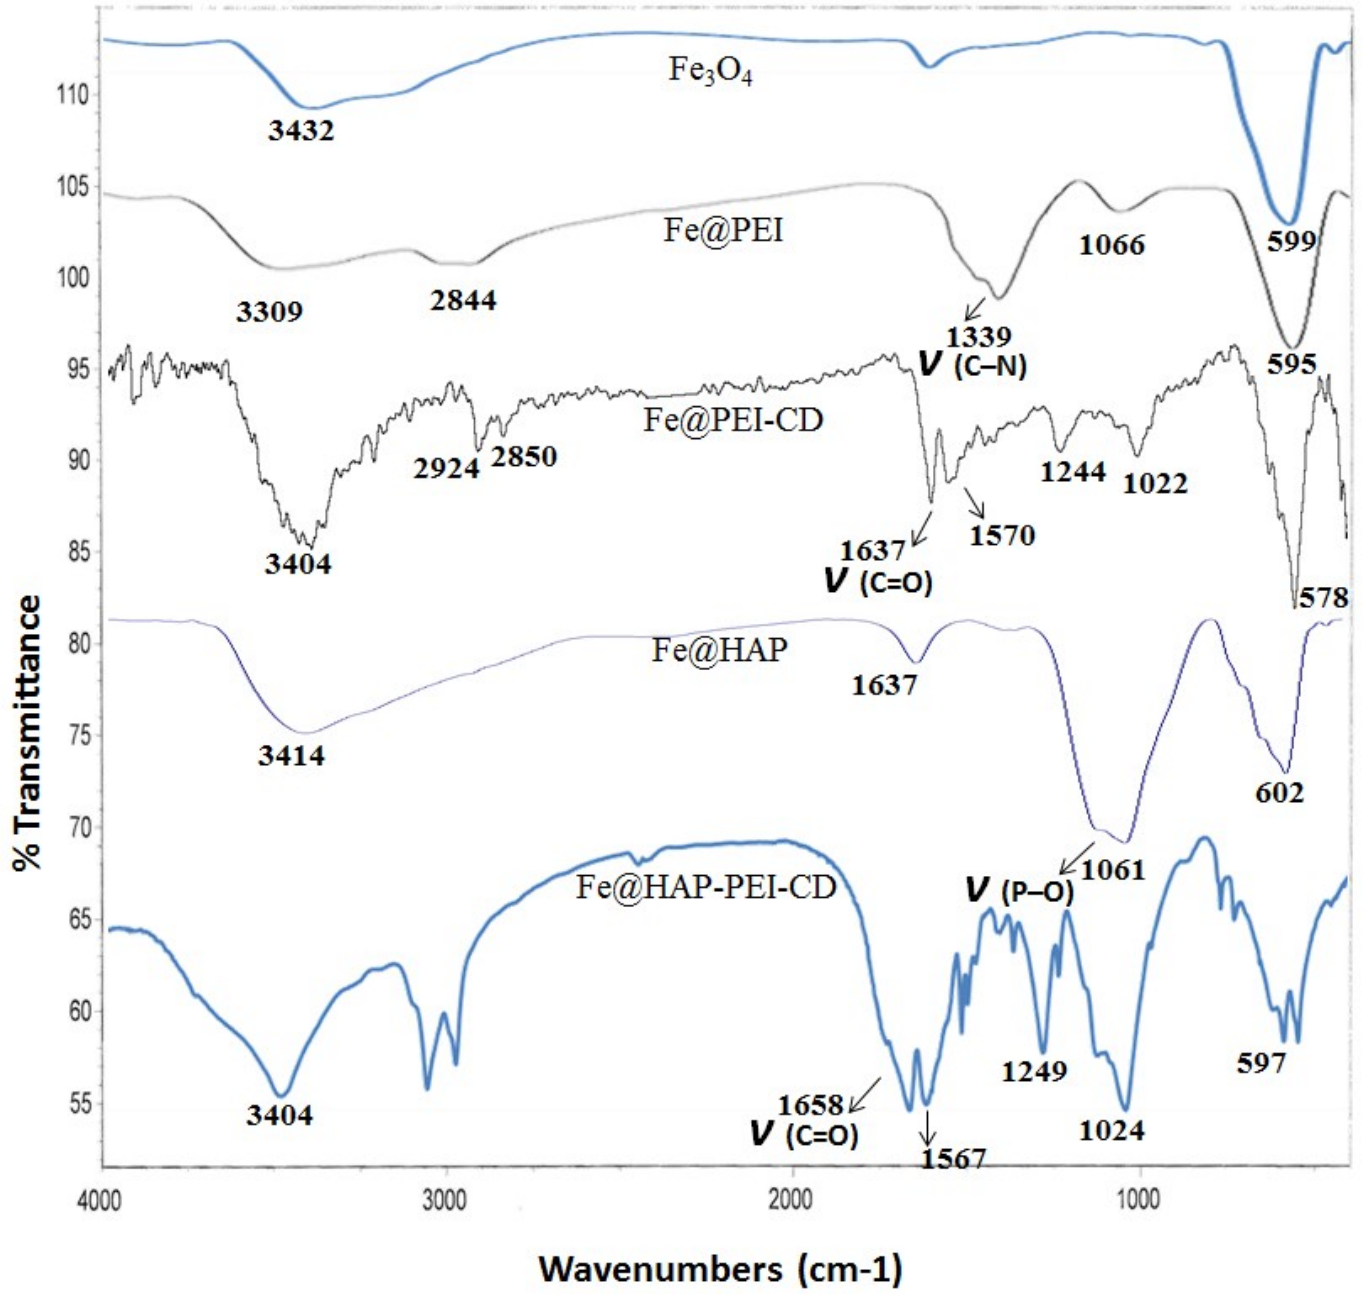

**Figure S2.** Representative photograph of dispersed solutions of 0.5mg bare MNP, unloaded and CUR- loaded different MNPs in 1mL ethanol: 1)  $\text{Fe}_3\text{O}_4$  MNP; 2)  $\text{Fe@PEI}$ ; 3)  $\text{Fe@PEI-CD}$ ; 4)  $\text{Fe@HAP-PEI-CD}$ ; 5)  $\text{Fe@PEI-CD-CUR}$ ; 6)  $\text{Fe@HAP-PEI-CD-CUR}$ .

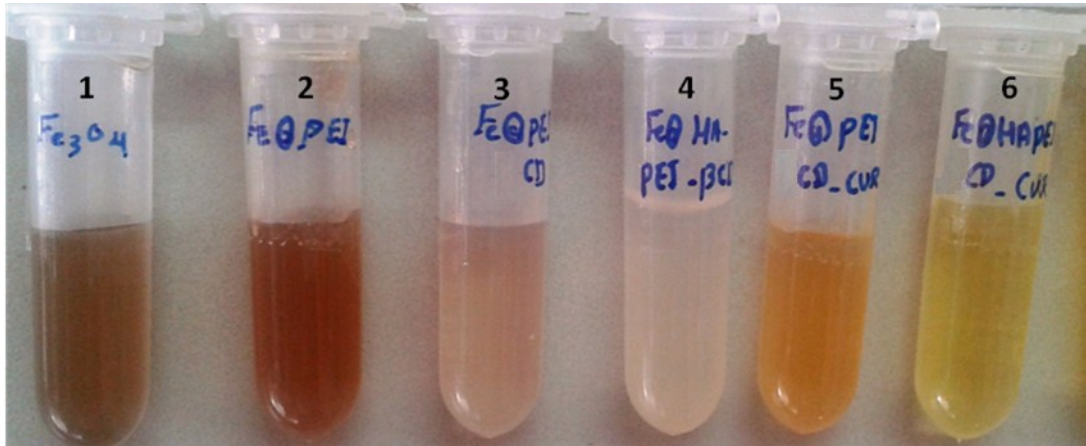

### **CUR standard solution for loading estimation:**

Standard CUR solutions in DMSO (1–7 µg/mL) was prepared and measured on UV-vis spectrophotometer at 450 nm. The absorbance of the solutions has been tabulated in Table S2. A standard plot was made from absorbance values (Figure S2).

### **Calculation of CUR loaded quantity:**

1 mg of both Fe@HAP-PEI-CD and Fe@PEI-CD was separately dissolved in 100 mL DMSO (**Solution A and B, respectively**). CUR was extracted in DMSO according to the method in manuscript and absorbency was measured at 438 nm using UV-vis spectrophotometer, **i.e., 0.2355 for solution A and 0.2150 for solution B.**

**CUR in Solution A and B** = (Absorbance value – intercept of standard plot) / (slope of standard plot)

$$\text{CUR in Solution A} = (0.2355 - 0.0077) / (0.1469) = 1.551 \mu\text{g/mL}$$

$$\text{CUR in Solution B} = (0.2150 - 0.0077) / (0.1469) = 1.411 \mu\text{g/mL}$$

$$\text{CUR containing in 1 mg Fe@HAP-PEI-CD} = 1.551 \times 100 = \mathbf{155.1 \mu\text{g}}$$

$$\text{CUR containing in 1 mg Fe@PEI-CD} = 1.411 \times 100 = \mathbf{141.1 \mu\text{g}}$$

**Table S2.** Absorbance values for 1–7 µg/mL CUR containing DMSO solutions

| CUR Standard solutions |                   |
|------------------------|-------------------|
| µg/mL                  | UV-vis absorbance |
| 7.1                    | 1.03              |
| 5.3                    | 0.774             |
| 4.2                    | 0.613             |
| 2.1                    | 0.303             |
| 1.1                    | 0.149             |

**Figure S3.** Standard plot of pure CUR in DMSO solution.

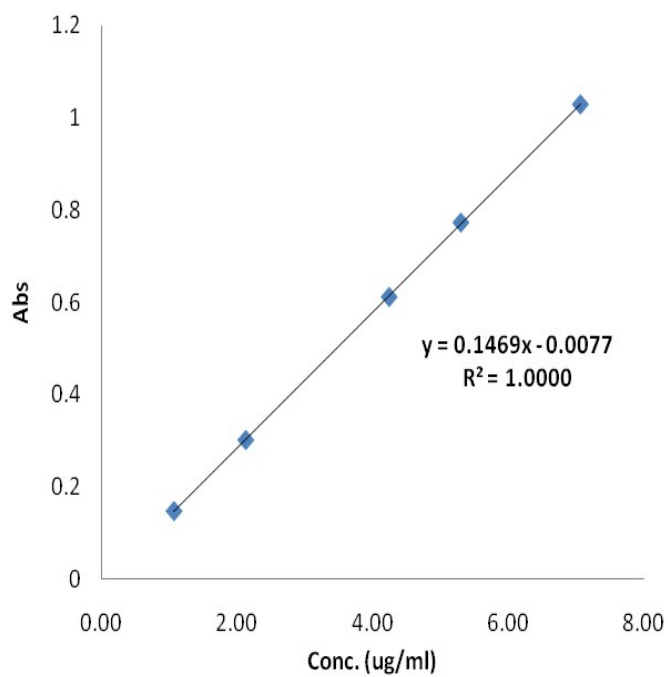

**Figure S4:** Standard calibration curve of CUR for estimation of CUR release percentage

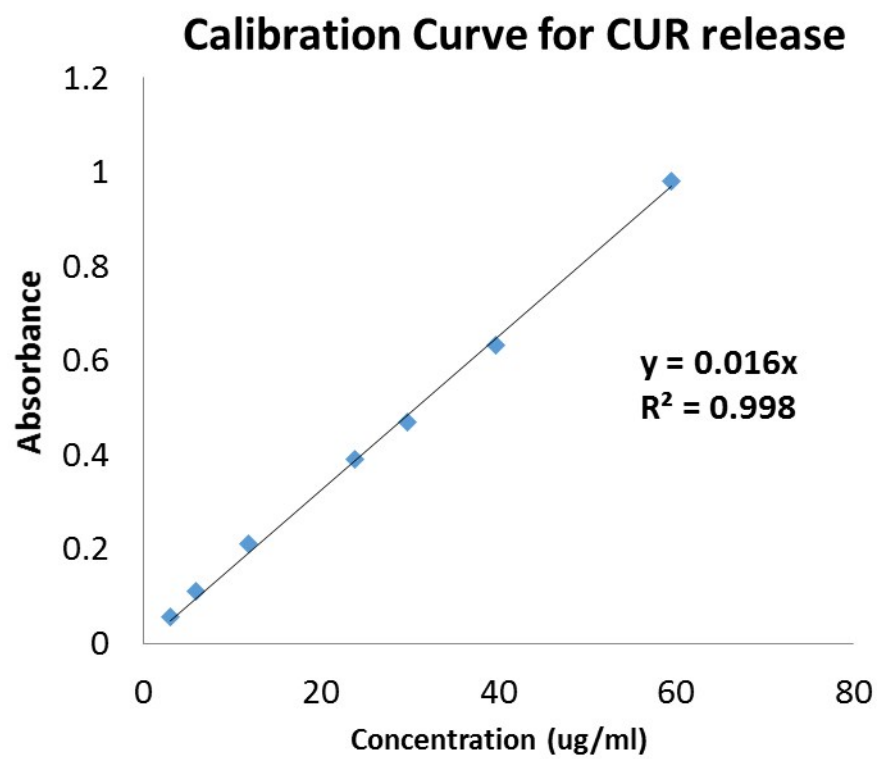

**Figure S5:** Uptake quantitative analysis of free CUR and CUR loaded MNP nanocomposites by flow cytometry

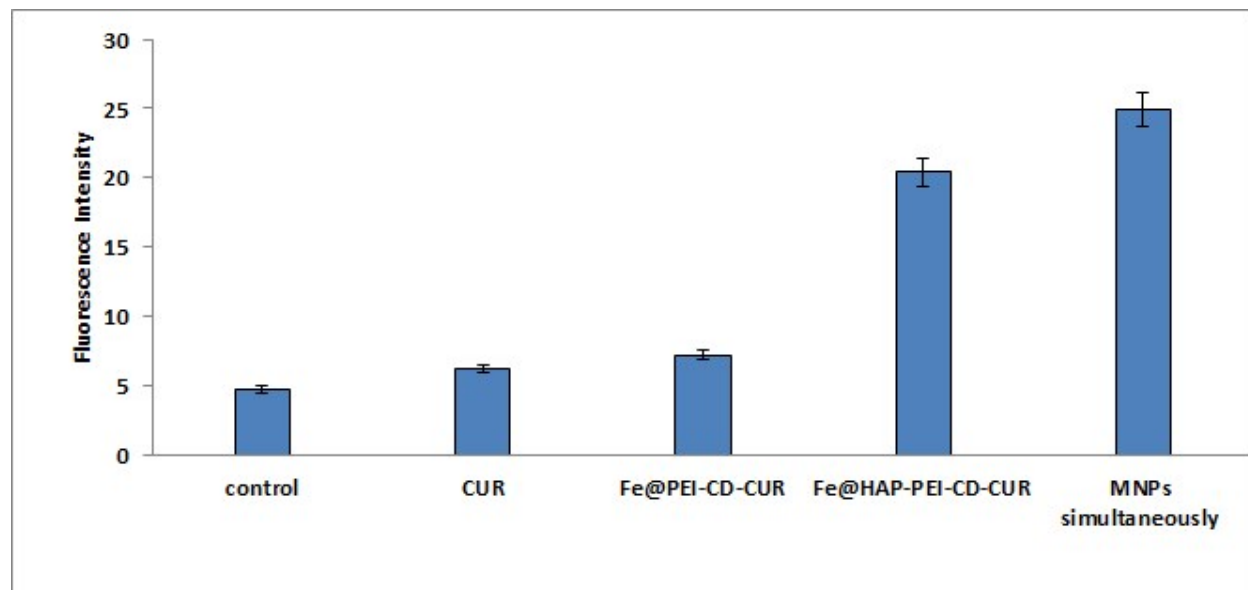

Supplement: c5ra13838h1.pdf [file c5ra13838h1.pdf]
